# Supplementary material for: Genome-Wide Identification of Pleiotropic Drug Resistance (PDR) Transporters in Salix purpurea and Expression Analysis in Response to Various Heavy Metal Stresses
Source: MDPI journal article supplement (doi:10.3390/agronomy13092330), 2023-09-06
Supplement: s1 [file s1]

Table S2 Segmentally duplicated PDR gene pairs in *S. purpurea*

| Gene ID          | Gene ID          | Duplication Type      | Ka        | Ks       | Ka/Ks    | Selection pressure  |
|------------------|------------------|-----------------------|-----------|----------|----------|---------------------|
| Sapur.001G143100 | Sapur.003G031500 | Segmental duplication | 0.194658  | 1.26675  | 0.153667 | Purifying selection |
| Sapur.001G143100 | Sapur.018G027000 | Segmental duplication | 0.173195  | 1.74851  | 0.099053 | Purifying selection |
| Sapur.002G168500 | Sapur.008G077900 | Segmental duplication | 0.287338  | 1.6897   | 0.170053 | Purifying selection |
| Sapur.002G168500 | Sapur.010G119700 | Segmental duplication | 0.24821   | 1.74768  | 0.142023 | Purifying selection |
| Sapur.003G031500 | Sapur.018G027000 | Segmental duplication | 0.212479  | 1.55628  | 0.13653  | Purifying selection |
| Sapur.006G094300 | Sapur.009G116400 | Segmental duplication | 0.215238  | 1.85538  | 0.116007 | Purifying selection |
| Sapur.006G205700 | Sapur.018G027000 | Segmental duplication | 0.0706426 | 0.354262 | 0.199408 | Purifying selection |
| Sapur.008G077900 | Sapur.010G119700 | Segmental duplication | 0.256742  | 1.72157  | 0.149133 | Purifying selection |
