# Supplementary material for: Genome-Wide Identification of Pleiotropic Drug Resistance (PDR) Transporters in Salix purpurea and Expression Analysis in Response to Various Heavy Metal Stresses
Source: MDPI journal article supplement (doi:10.3390/agronomy13092330), 2023-09-06
Supplement: s1 [file s1]

### Primer sequences for qRT-PCR

| ID      | 5' primers           | 3' primers            |
|---------|----------------------|-----------------------|
| DnaJ    | GCACCAAATTTGAGCAGGAT | TACAAAACCCCACTGCTTCC  |
| SpPDR1  | TGACTCTGCTTCTGGGTCCT | GCAGAGAACGCCAAAGTTTC  |
| SpPDR2  | CAGGCGAGGATAACGAGAAG | TAAGGATGGCGAGTGGTTTC  |
| SpPDR3  | GCGACAGAAGGTCAGGAGAC | CTGCTTGACGGAGTTCACAA  |
| SpPDR4  | TCGCGTACCTTAGTCCTGCT | GGCATTTCACCTAGTGCAT   |
| SpPDR5  | GCACTTCTCTGGCAAAAAGG | ACAACCACCTGTGCAAATGA  |
| SpPDR6  | CGAGTACTTCAGCCCTCCTG | CAACTCCATTGTCTGCTTCA  |
| SpPDR7  | GATGAGCCCCACTGTTTTGT | AGCTGCACCAGCTTGAAAAAT |
| SpPDR8  | GTACCAGGGTCCTCGTGAAA | GGGACTGAAAGCTCATCTGC  |
| SpPDR9  | GTACCAGGGTCCTCGTGAAA | GGGACTGAAAGCTCATCTGC  |
| SpPDR10 | CCATGGGCATATTCAATTCC | AGTAGCGCAAAGACCCAAA   |
| SpPDR11 | CGTTATCGAACCGTGGAAGT | GAGGATGCCCTGATTTTTC   |
| SpPDR12 | AGGATGAGGAAAGGGATGCT | AATCCCCACCCTATCAGTCC  |
| SpPDR13 | TTACATGAAGGCAGCAGCAC | CGGAGATGCCTCGTATCATT  |
| SpPDR14 | CAGTTGTTTGACCATCCAC  | AGGCACCCAGGAATACTCT   |
| SpPDR15 | AAGCTGCAGCCATGACTTTT | CCAGCATTTACCGGTAGTT   |
| SpPDR16 | GGTGGGATTCTGGATTTTT  | AGGCAAAGATGAAGCCAAGA  |
| SpPDR17 | TCCAAGCGTCGAAATAGCTT | CATGAAGTGGGGGAGAGGTA  |
| SpPDR18 | TTCGGGTCAGCTGCTCTATT | ACTGGAAGGCAAACTGTGCT  |
| SpPDR19 | CGACGTTGATTCAGAGACGA | CGTTGCTCGGTAGAGAGACC  |
| SpPDR20 | GTCCGGCTAGAGTGCTGTTC | TTGCAGCAAGGAAATGACAG  |
| SpPDR21 | ATAGCCGGTTCAATGTACGC | GCAAATGAATAGGCCCAAGA  |
